# Supplementary material for: Enhancing Artificial Intelligence for Twitter-based Public Discourse on Food Security During the COVID-19 Pandemic
Source: Preprints.org preprint supplement (doi:10.20944/preprints202207.0196.v1), 2022-07-13
Supplement: Supplementary file 2 [file supplementary]

Supplementary Table 1: Tweet, Like, Quote, Reply, and Retweet Counts from 2020-2021

| **Year** | **Tweets** | **Likes** | **Quotes** | **Replies** | **Retweets** |
| --- | --- | --- | --- | --- | --- |
| 2020 | 116500 | 919317 | 17572 | 72655 | 215398 |
| 2021 | 120607 | 1038339 | 23036 | 81430 | 294122 |

Supplementary Table 2: Top sources of tweets, 2020-2021

| 2020 | | 2021 | |
| --- | --- | --- | --- |
| **Twitter for iPhone** | 44165 | **Twitter for iPhone** | 45868 |
| **Twitter Web App** | 23825 | **Twitter for Android** | 27190 |
| **Twitter for Android** | 23545 | **Twitter Web App** | 25940 |
| **OLIO Articles Plugin** | 7808 | **OLIO Articles Plugin** | 5865 |
| **Twitter for iPad** | 2718 | **Twitter for iPad** | 2429 |
| **Instagram** | 1497 | **TweetDeck** | 1467 |
| **TweetDeck** | 1426 | **Hootsuite Inc.** | 1130 |
| **Hootsuite Inc.** | 1418 | **Fan Experiences Platform** | 925 |
| **Twitter Web Client** | 1093 | **dlvr.it** | 701 |
| **Buffer** | 698 | **Sprout Social** | 649 |

Supplementary Table 3: Top ten hashtags and mentions per year, 2020-2021

| **2020** | **2021** |
| --- | --- |
| **Hashtags** | |
| #free | #free |
| #UnitedKingdom | #UnitedKingdom |
| #foodwaste | #foodwaste |
| #London | #TigrayGenocide |
| #food | #food |
| #zerowaste | #Tigray |
| #COVID19 | #StopTigrayFamine |
| #Mexico | #London |
| #Dagenham | #zerowaste |
| #Food | #FastFoodies |
| #free | #free |
| **Mentions** | |
| @realDonaldTrump | @UN |
| @pulte | @POTUS |
| @senatemajldr | @SecBlinken |
| @JoeBiden | @pulte |
| @SpeakerPelosi | @EU_Commission |
| @JeffreeStar | @WFP |
| @AOC | @JosepBorrellF |
| @WhiteHouse | @USAmbUN |
| @FredTJoseph | @PowerUSAID |
| @YouTube | @AbiyAhmedAli |

Supplementary Table 4: Most liked and most retweeted tweets per year, 2020-2021

| **Year** | **Month** | **Most Liked** | **Most Retweeted** |
| --- | --- | --- | --- |
| 2020 | January | Here is a grown man complaining about the free food at an event he's not going to https://t.co/c0wQTfdL71 | Here is a grown man complaining about the free food at an event he's not going to https://t.co/c0wQTfdL71 |
| February | I’m proud to stand with @32BJSEIU and the fast food workers of New York City in the fight against arbitrary firings and reductions in hours. Employers should not be able to fire workers at any time for any reason. Fast food workers need #JustCause protections now. https://t.co/hrYxp45f0i | We're sure that @FoodBank4NYC and @jimmyfallon @FallonTonight would be thrilled with the support of #BTSARMY - and so would those facing food insecurity in NYC - so we say... if you feel moved, go on and do what your heart tells you, ARMYs @BTS_twt https://t.co/pI4Dz7TFz6 |
| March | On coronavirus: @SpeakerPelosi & I demand Trump admin put people over corporations: Paid sick leave Enhanced unemployment insurance Food security Frontline worker protections Widespread, free testing Affordable treatment Price gouging protections Increased medical system capacity https://t.co/BI5S5WhKN8 | On coronavirus: @SpeakerPelosi & I demand Trump admin put people over corporations: Paid sick leave Enhanced unemployment insurance Food security Frontline worker protections Widespread, free testing Affordable treatment Price gouging protections Increased medical system capacity https://t.co/BI5S5WhKN8 |
| April | Just spitballin' here, but what if Trump is pushing fake cures (injecting disinfectants), deadly re-opening of society, trying to limit testing, so by November we're in an even bigger crisis, he can declare martial law, cancel elections, and control our food supply to contain us? | Just spitballin' here, but what if Trump is pushing fake cures (injecting disinfectants), deadly re-opening of society, trying to limit testing, so by November we're in an even bigger crisis, he can declare martial law, cancel elections, and control our food supply to contain us? |
| May | @MJStevenson97 @finessence_ funny enough, jeff bezos actually controls a highly efficient worldwide distribution network! It’s so weird that he hasn’t used it to distribute food to starving people! haha weird right! | Do you have food to eat? If so, you are richer than a lot of my followers (teammates). For a man who has kindness in his bio, instead of throwing hate at a philanthropist, I kindly request that you give some to help those in need. There are plenty in my feed https://t.co/80LPzpK7qW |
| June | unconditional love and empathy from all directions. so incredibly moved by how peaceful everyone was, offering free water and food and sunscreen, we all came together. this movement is SO powerful and unifying. unbelievably proud of my city https://t.co/TFCYKisQJX | Asalaam allaykum I will be raising Â£8k for our brothers and sisters in yemen in shaa allah.This includes water wells and food parcels.Yemen has the largest humanitarian crisis occurring right now. Letâ€™s reach the target by Donating just as little as Â£1 https://t.co/5uxv8rro8i |
| July | The first town fridge is up and fully stocked on Linden &amp; 30th st. In west Oakland!!! This is free food for people who need it! Spread the word and follow @townfridge on Instagram for more updates on where fridges will be!! https://t.co/WlwjmbwTZ2 | No rent assistance. No food assistance. No money to help state &amp; local governments keep essential workers on payroll.  But $1.7 billion handout to rebuild the FBI building &amp; help increase the property value of the nearby Trump hotel.  https://t.co/0pfSxwl6or |
| August | Y’all ever ordered food and were starving because you haven’t ate at all and it arrives and it just doesn’t hit the spot and you’re so disappointed and not even hungry no more | Day 12 of Mitch’s 25-Day Vacation: While Mitch sat on his hands and obstructed COVID relief, my team raised over $50,000 for KY food banks. Kentuckians are still starving, but Mitch abandoned them for a long vacation. #LeadersDontLeave https://t.co/SC91yR8ke2 |
| September | But EVERY SINGLE AMERICAN made a profit.  Churches were built with slave labor AND received tithing from slave owners. The railroads were built with it. EVERY American was able to buy cheap food and clothes because cotton &amp; plants were planted, grown &amp; harvested with free labor. | I suggest all civil servants keep detailed diaries & journals, in safe places.  They'll need them when called as witnesses for the prosecution.  Food & Medicine shortages. Deaths, bankruptcies. Lies, subversion & treason.  We need to hold this bastard govt to account. |
| October | Stopped at Circle K to get gas. A couple had a I’m sign. Gave em $1. Saw inside they sold food, so I bought a couple of hoagies, apples, bottled water and hand sanitizer for them. Only left me $5 for gas, but it was worth it | hey please retweet if you can me and my mother are moving out of our abusive household and we need money for food. our new landlord lied about how much the down payment would be and while we can afford it we wont have any money left. i can do commissions until the day we move. + |
| November | Michael Jordan has pledged a portion of proceeds from his hit ESPN documentary series, "The Last Dance," to food banks to help feed hungry families and individuals in need this holiday season. https://t.co/sFIXYtWUJd | As we look forward to normal again , let’s remember normal had lots of enduring challenges:  These 8 states have the highest rates of food insecurity in the United States: Mississippi (18.7%), Louisiana (18.3%), Alabama (18.1%), New Mexico (17.6%), Arkansas (17.5%), |
| December | Just picked up some food from a restaurant. Astonishing number of people sitting eating indoors, in groups, without masks.  What is wrong with people? Do they not know nearly 4,000 people died *yesterday alone* from Covid? Do they just not care? I really don’t get it. I don’t. | @Broadricks3's account is temporarily unavailable because it violates the Twitter Media Policy. Learn more. |
| 2021 | January | I saw this on FB and it's the best food pantry donation list I've ever seen. Usually posts like this either end up shaming the donor for what they do or don't give, or shaming the receiver for what they do or don't choose to eat.   As a former pantry employee, I endorse! https://t.co/GdvAkLHUDY | We are all ordinary people in extraordinary times. What I did isn’t special, it’s the same thing that drives us to volunteer at a homeless shelter or donate to a food bank: the idea that if something is broken, we can work to fix it. https://t.co/3kHTWKiLem |
| February | It is important that the world stand in solidarity with Indian farmers!  Farmers are on the frontlines of the climate crisis. Without farmers, there is no food.  Please support the #FarmersProtest!   #FarmersProtestIndia #IStandWithFarmers #supportfarmerprotest #supportfarmers https://t.co/9YDn2zutcG | Hey guys with corona changing my life all the way around I’ve pivoted & acquired a restaurant along w @ImChefKeem in Baltimore, MD (1818 Maryland Ave). We have some of the best tasting food. If you get a chance come check us out or order door dash/grub hub under ‘Set The Table’ https://t.co/q7uMR5ioFx |
| March | non-muslims feel free to rt this!! i saw a tweet about this and i would also like to spread the word, but since ramadan is coming up do not use the "NSFR - not safe for ramadan" tag when posting food! it defeats the whole purpose for ramadan for us, and it is unneeded! | During the pandemic, the Culinary Academy in Las Vegas has provided food to families in need. I was happy to visit and share that the American Rescue Plan has begun to provide relief directly to families in need with up to $1,400 checks going to more than 2.5 million Nevadans. https://t.co/C4IkNIm5DU |
| April | I know I will be getting hell for this, but please also remember the people who only have a pet as a companion, it is often their life line, so putting in a tin of pet food into a food bank collection is not frivolous but an act of kindness | READ: Ana Patricia Non, the woman behind the Maginhawa community pantry, announced the temporary closure of the free food pantry today following incidents of red-tagging.  Non also sought for QC Mayor Joy Belmonte's help as she fears for her and volunteers’ safety. AP Non https://t.co/vE5XHe38IS |
| May | @tim23white @_melissacastle you haven’t touched your food, aren’t you hungry? her: https://t.co/oCztp2Tyyj | The Restaurant Revitalization Fund is helping restaurants and hard-hit food establishments â€” bars, bakeries, food stands, food trucks, caterers â€” to help businesses get grants to cover payroll, rent, utilities, and supplies. Learn more at https://t.co/9A2zcpAaij https://t.co/khYMtaU2B7 |
| June | Suicide prevention isn’t just posting the suicide hotline. Healthcare is suicide prevention. Housing is suicide prevention. Food security is suicide prevention. Access to mental health care is suicide prevention. | If I were to ever ever ever hear of anyone I consider mine sitting somewhere hungry while a sack of flesh they’ve let see them naked did not give them food, you would have to lock me in a garage. https://t.co/inxHfackIq |
| July | Not sure if you know this Sean, but transactions aren’t capitalism.  Capitalism is a system that prioritizes profit at any &amp; all human/enviro cost.  But fwiw our shop is unionized, doesn’t operate for profit,& funds projects like free tutoring, food programs,& local organizing. https://t.co/RPnMlg0mpS | been found by abuser and need to raise $640 asap for safety (a room+transportation+food) pls help by QRT/RT even if u can’t donate! very urgent. thank you https://t.co/KuTiDR90YJ |
| August | I need to have food ready to eat before I watch a YouTube video | It's time to stop all government benefits for people who won't get vaccinated. Including unemployment, SSI, SSDI, housing or food assistance etc. Unless the recipient has a legitimate medical reason for not getting vaccinated. |
| September | @deleted24628 LITERALLY I used to always add a donation onto my purchases to small good things until I learned about the tax write off bs!! Just donate small amounts to good charities directly or volunteer somewhere or donate blood or clothes or food. Walmart does NOT need your 73 cents | The Johnson regime will not keep you safe. It will not ensure fuel makes it to the pumps. Or food from farm to table. It won't ensure you can afford to warm your home.  It won't ensure hungry kids get fed. Or NHS staff get paid. It won't take simple steps to protect against Covid |
| October | Reminder that when Biden did not have a peaceful transfer of power, he also inherited a raging pandemic with 500 thousand dead Americans, survivors with long #covid, a tanked economy, miles-long food lines, a destroyed government. He has already built back better given all of it. | This is why letting people withdraw their EPF is not government aid   Data shows low-income people are more likely to make short-term decisions that make things worse off for them long term. When you can’t pay rent or buy food, you won’t think about retirement. https://t.co/mk697BOvWk |
| November | Don’t sleep on all the milk hate.  They call it a treat, mock the poor for not being able to afford it, say it’s unhealthy.  Milk is the single most nutritious food on the planet. It has everything you need. It’s the only food in existence that was literally designed to be food | People of Amhara and Afar who live under TPLF brutal invasion are in a serious humanitarian crisis. No food, no medicine. This inept, morally corrupted so called WHO director doesn't care about other Ethiopians who suffer more than the people he claims he belongs to. Shame WHO! https://t.co/C8RNXoXkZY |
| December | OMMMGGGGG I NEED IT.Wow I can’t wait to put this in my crib ..Thank you sooo much pick it up at your crib ? Can you save me some food? Cause I be seeing you throw it down in the kitchen!!! https://t.co/vtYT32EjOJ | they need blanket and food. Its been 8 hours tapi takda langsung bantuan masuk dekat Sek Keb Mat Kilau Its raining heavily outside. Kids are crying. Ramai warga emas. they came here by themselves hoping ada bantuan here but none. #DaruratBanjir |
